# Supplementary material
Source: Springer Nature journal article supplement (https://www.springermedizin.de/resource/supplementary/13006_2009_98_MOESM1_ESM.pdf/9628006)
Supplement: MOESM1 [file 9628006]

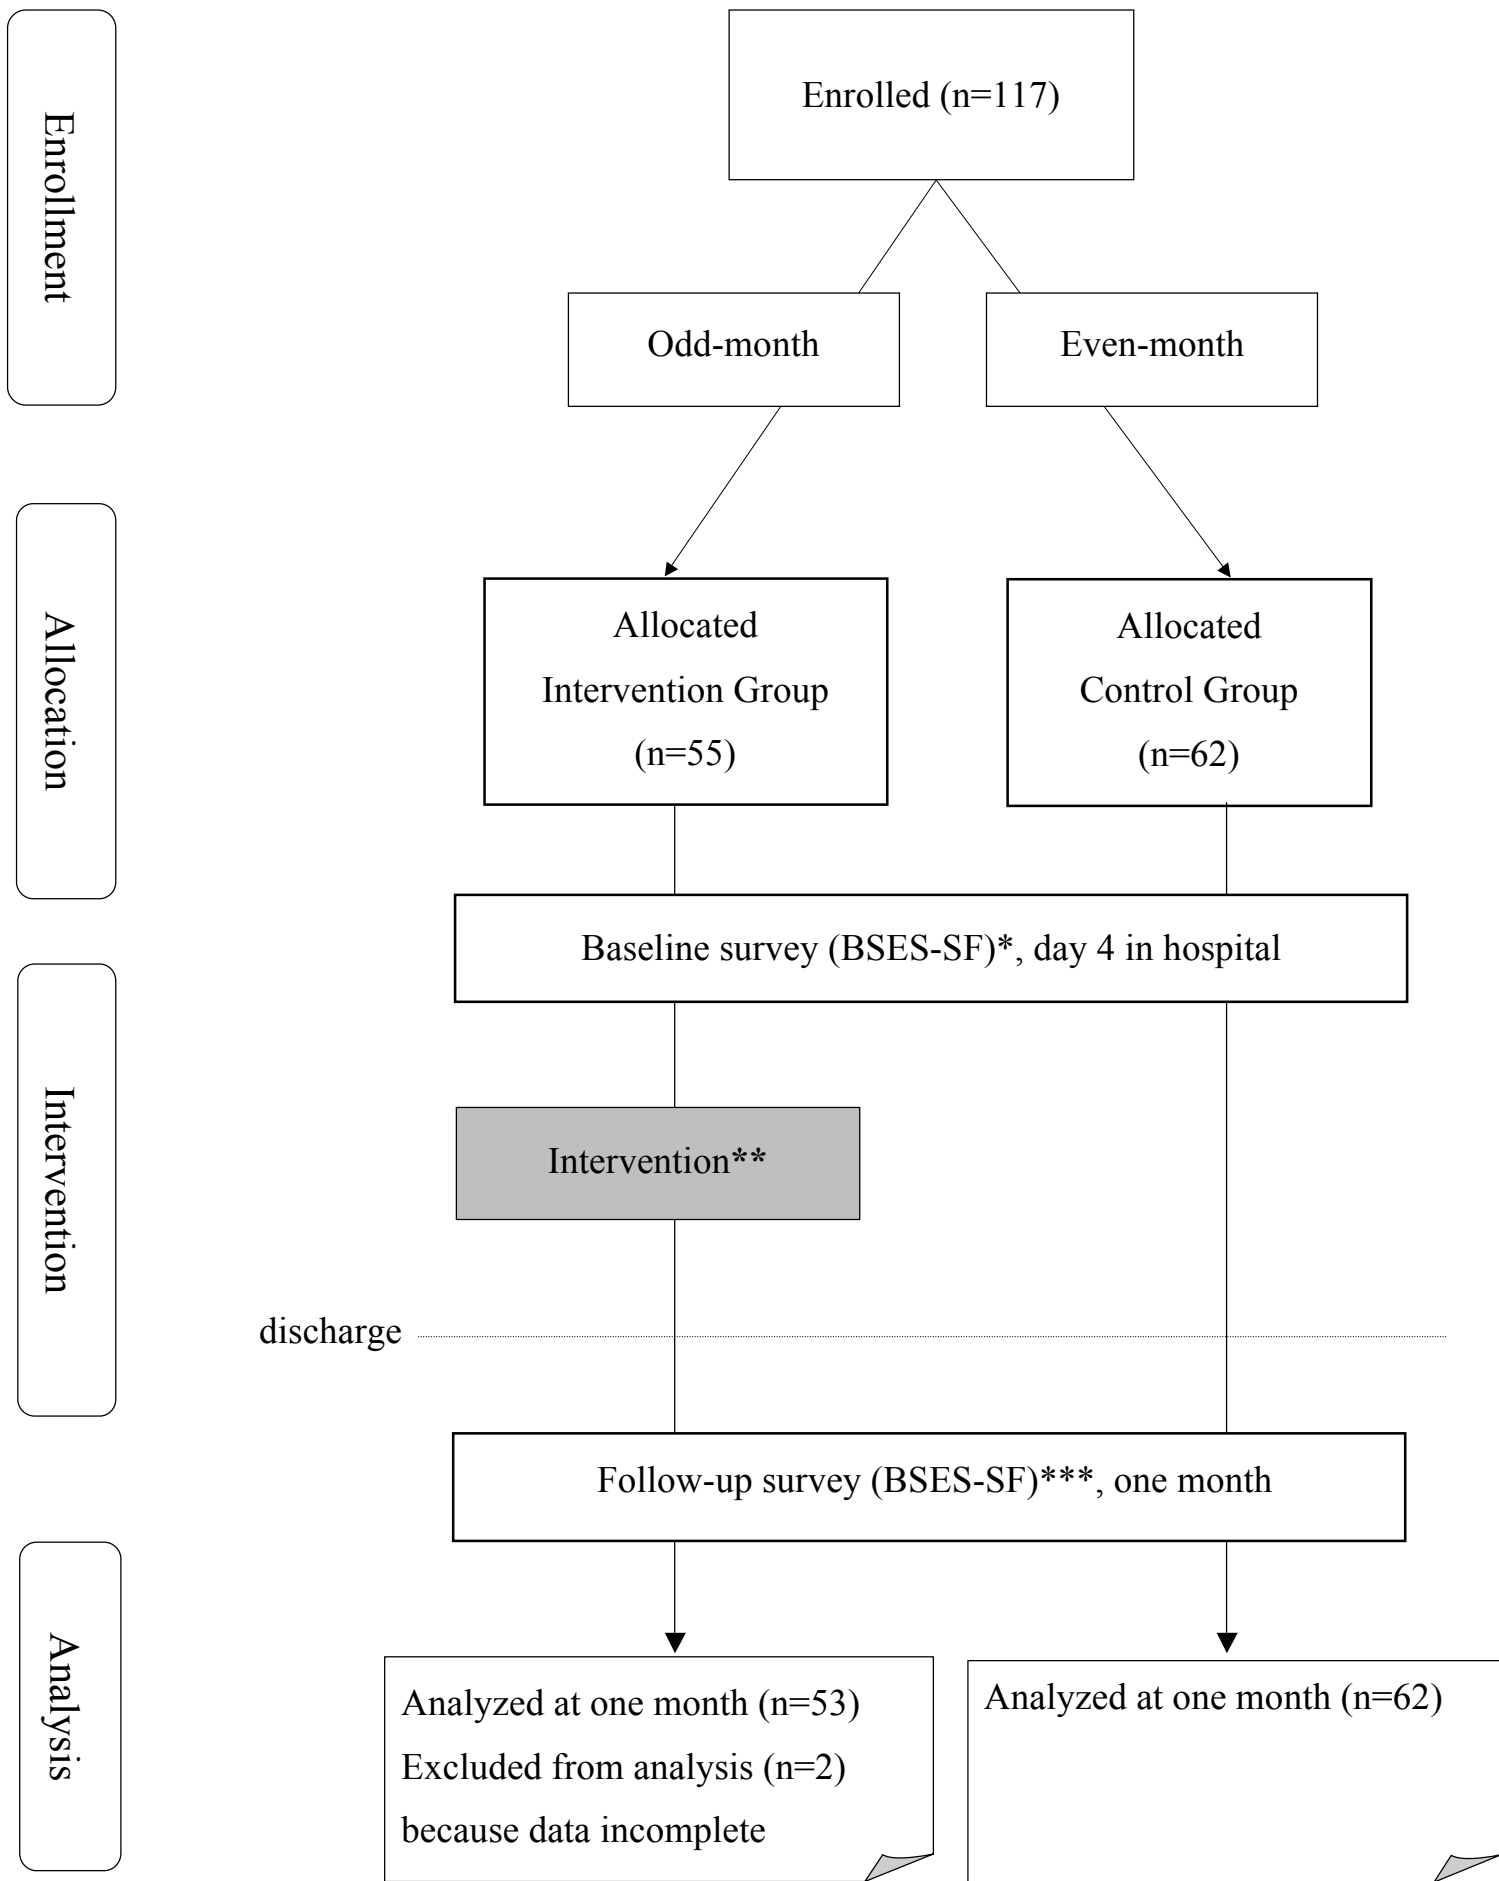

Implementation timing: \* Early postpartum (before discharge), on day 4

\*\* Before discharge on day 4 or 5

\*\*\* 1 month health check up
